# Supplementary material for: The inhibitory role of intracellular free zinc in the regulation of Arg-1 expression in interleukin-4-induced activation of M2 microglia
Source: Royal Society of Chemistry journal article supplement (doi:10.1039/c8mt00248g), 2018-09-03
Supplement: c8mt00248g1.pdf [file c8mt00248g1.pdf]

Supplementary Information

**The inhibitory role of intracellular free zinc in the regulation of Arg-1  
expression in interleukin-4-induced activation of M2 microglia**

Takaaki Aratake, Youichirou Higashi, Yusuke Ueba, Tomoya Hamada, Takahiro Shimizu, Shogo Shimizu, Toshio Yawata, Tetsuya Ueba and Motoaki Saito

Contents

Supplementary Figure: S1 – S3

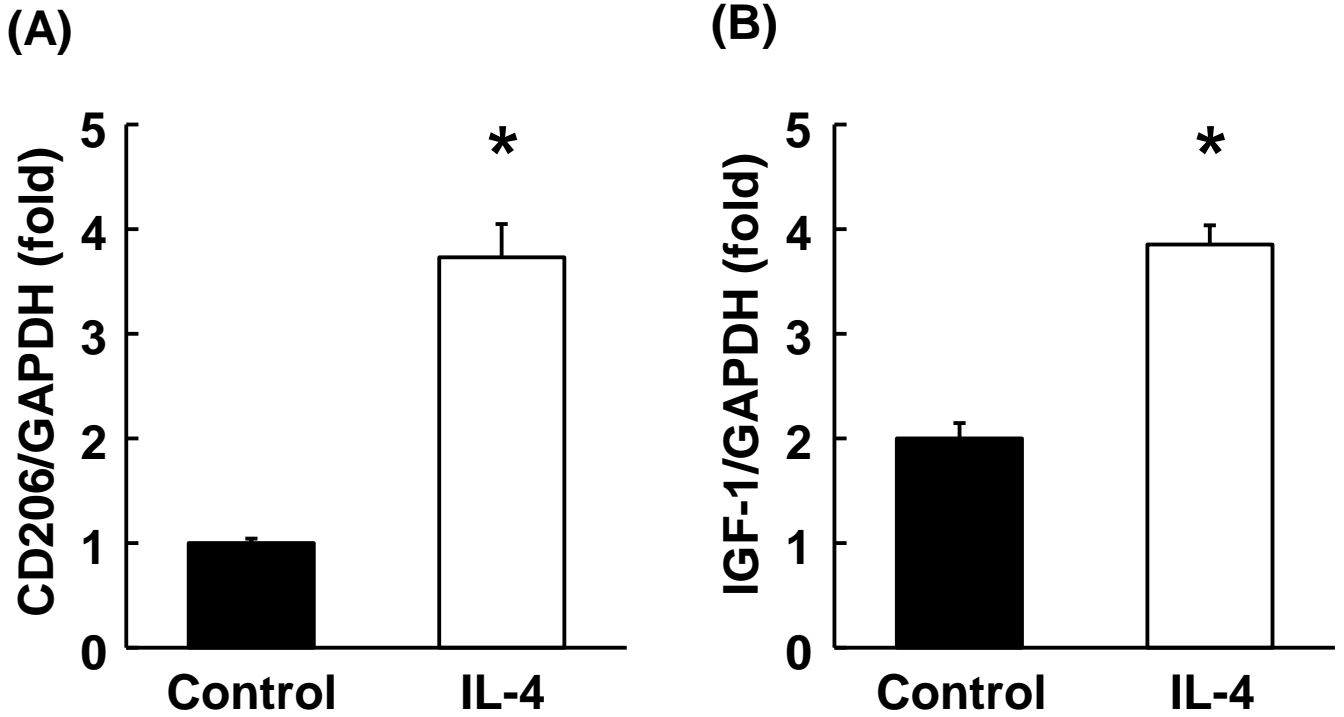

**Supplementary Figure S1.**

**Induction of *CD206* and *IGF-1* mRNA expression in microglia following stimulation with IL-4.**

Microglia were treated with 10 ng/mL IL-4 for 6 h. The mRNA levels of *CD206* (A) and *IGF-1* (B) were measured using real-time quantitative PCR and normalized to levels of *GAPDH* mRNA. Data are shown as the mean  $\pm$  standard error of the mean ( $n = 4$ ). \* $p < 0.05$ , relative to controls without IL-4 (t-test).

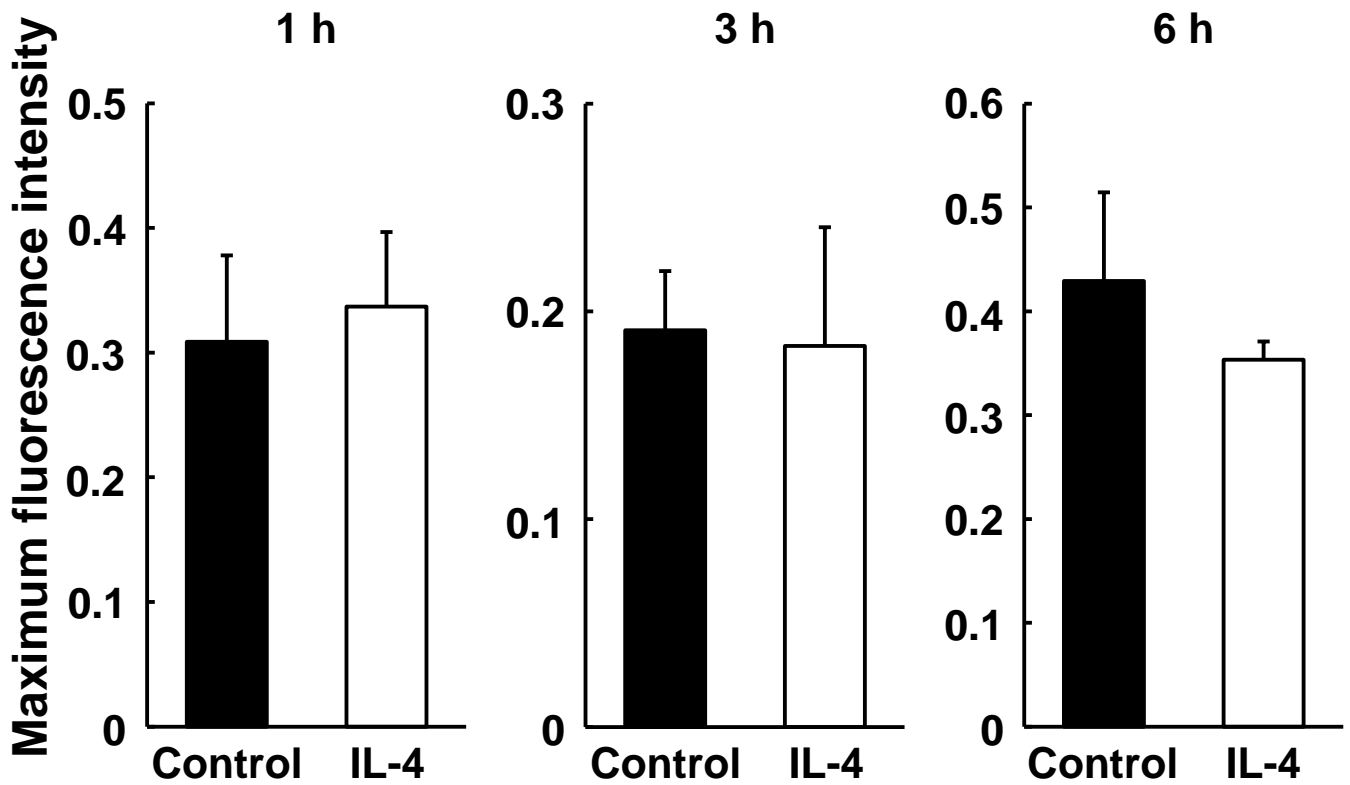

**Supplementary Figure S2.**

**The effect of IL-4 on nonspecific esterase in microglia.** Microglia were treated with 10 ng/mL IL-4 for 1–6 h and were loaded with FluoZin-3AM. Maximum fluorescence intensity was measured in the presence of 50  $\mu$ M zinc pyruithione. Data are shown as the mean  $\pm$  standard error of the mean ( $n = 3$ ). \* $p < 0.05$ , relative to controls without FluoZin-3AM (ANOVA followed by t-test).

(A)

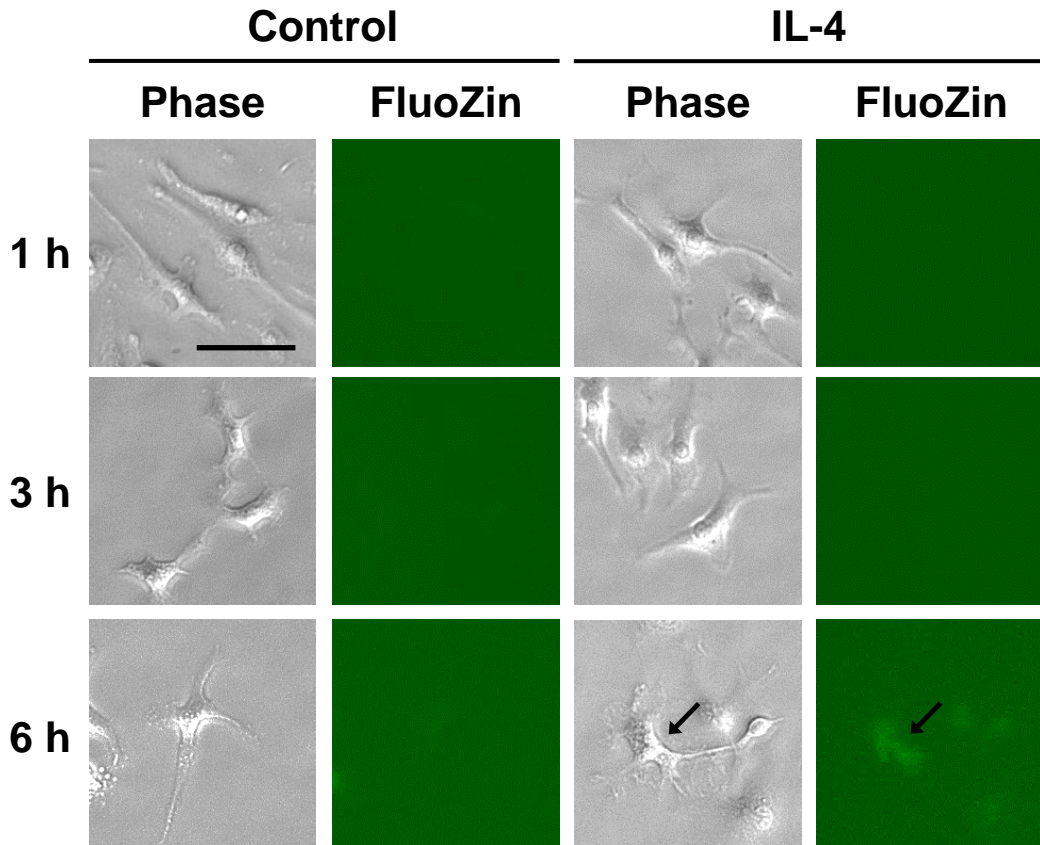

(B)

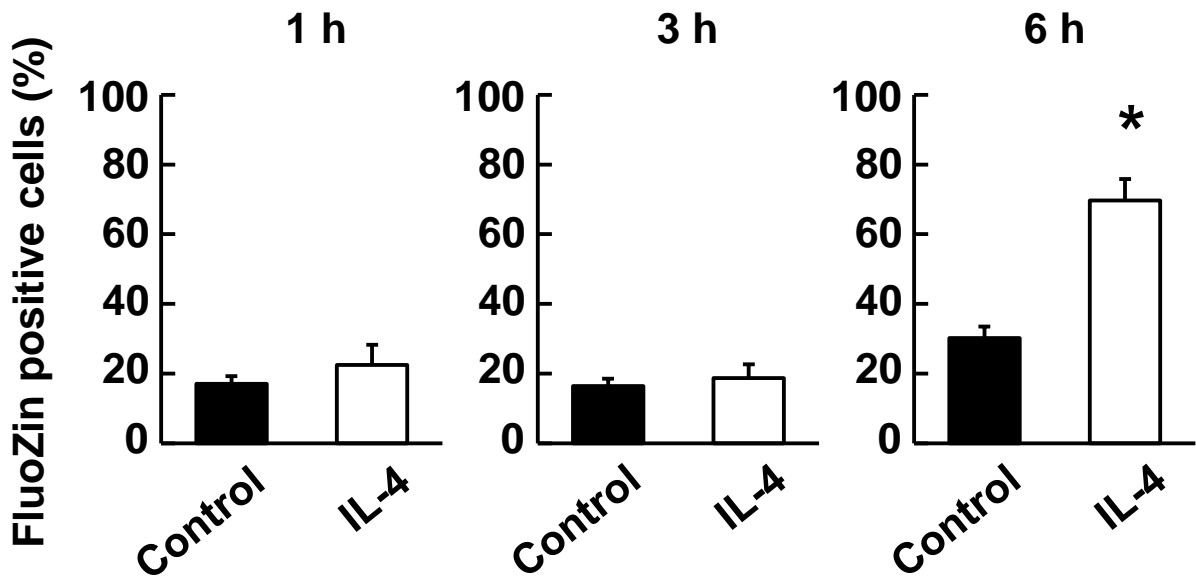

Supplementary Figure S3.

The effect of fixation on FluoZin-3AM fluorescence signals. (A, B) Microglia were treated with 10 ng/mL IL-4 for 1–6 h and were loaded with FluoZin-3AM (green). (A) Representative merged phase-contrast images of microglial morphology and FluoZin-3AM fluorescent signal. Scale bar = 50  $\mu$ m. Data are shown as the mean  $\pm$  standard error of the mean ( $n = 4$ ). \* $p < 0.05$ , relative to controls without IL-4 (t-test).
